# Supplementary material for: Composition and dynamics of the bacterial communities present in the post-slaughter environment of farmed Atlantic salmon (Salmo salar L.) and correlations to gelatin degrading activity
Source: PeerJ. 2019 Jun 4;7:e7040. doi: 10.7717/peerj.7040 (PMC6555393; doi:10.7717/peerj.7040)
Supplement: Table S2 [file peerj-07-7040-s005.xlsx]

## Sheet: Abdominal samples
	Abdomen day 2						Abdomen day 3						Abdomen day 4						Abdomen day 7
Time (min)	B1a	B2a	B3a	B4a	B5a	B6a	B1b	B2b	B3b	B4b	B5b	B6b	B1c	B2c	B3c	B4c	B5c	B6c	B1d	B2d	B3d	B4d	B5d	B6d
0	6078.22	555.967	49791.1	-2820.78	-2875.43	-5447.18	21594.6	14831.9	10616	-1427.78	-3798.88	9830.87	37982	872.807	33259.8	14555.3	8039.37	1478.52	57631.5	56520.3	55076	45059.5	54728.3	33405.4
10	6744.93	1249.88	72629.2	-1845.92	-2048.77	-4587.22	22473.8	15676.1	17256.8	-437.267	-3092.87	10563.3	38159.1	1279.83	39383.5	15370.9	9578.28	2453.78	57446.6	58629.4	56125.3	45222.2	55256.6	33671.8
20	7178.77	1567.02	94989.4	-1294.18	-1460.18	-4038.38	23106.9	16029.5	23639.3	48.0667	-2727.73	10957.7	37752.6	1319.85	44558.4	15808.3	10572.9	3022.42	56966.9	60005.9	56027	45503.4	55146.7	33535.8
30	7533.68	2000.93	115702	-869.067	-1088.02	-3689.07	23579	16038.8	29992.6	377.783	-2472.12	11311.9	37466	1195.44	49267.6	16196.4	11340.8	3471.28	56349.9	61081.5	55647	45450.2	54642.3	33085.8
40	8101.55	2295.75	135707	-255.85	-628.7	-3144.8	23860.2	16223.1	36096.3	893.55	-2149.55	11658.8	37295	1313.11	54051.6	16572.7	12252	3984.85	55516.2	62126.3	55469.7	45433.3	54312.5	32911.5
50	8588.8	2570.6	154666	174.45	-208.9	-2784.85	23971	16362.3	42199.1	1268.7	-1893.3	11939.2	36858	1500.85	58416.7	16960.1	13004.1	4309.1	54704.8	62558.2	55226.3	45298.4	53834.8	32427.7
60	8963.42	2836.32	172540	601.817	119.267	-2456.73	24300.8	16527.9	48301.8	1581.17	-1690.68	12218.2	36341.7	1323.6	62784.8	17214.7	13516.7	4694.07	53959.1	62927	55035.2	45515.1	53388.9	31932.8
70	9272.52	3058.72	189569	1086.02	526.267	-1978.98	24504.3	16654.9	54508.4	1900.42	-1471.18	12509.5	35989.5	1603.49	67346.9	17450.6	14125.7	5099.52	53009.3	62942.3	54929.3	45244.8	52807.1	31359.5
80	9740.92	3257.67	205127	1432.92	771.517	-1737.13	24848.8	16705.5	60381.7	2329.97	-1303.38	12703	36374.4	1303.29	71768.1	17794.5	14621.1	5375.12	52171.4	63143.1	54492.1	44944.9	52912.4	30903.1
90	10047.1	3459.02	220286	1933.17	1065.82	-1366.98	25276.2	16768.5	66188.8	2630.07	-1096.68	12942.2	35975.2	1489.51	76313.9	18133.9	15187.9	5691.57	51343	63236.9	54670.5	44967.8	52622.7	30604.1
100	10292.9	3709.37	233957	2292.57	1357.42	-1047.48	25228.3	16823.6	72007.3	2874.47	-966.033	13207.6	35717.2	1417.79	80658.8	18426.3	15671.5	5961.27	50951.7	63108.3	54447	45021.7	52583.7	30001.3
110	10534.9	3963.48	247101	2729.38	1541.13	-742.617	25309.1	16853.7	77564.5	3199.13	-710.817	13415	35594.8	1407.02	84884	18738.3	16098.4	6300.13	50151.2	62945	54467.9	44534.7	52176.2	29769.4
120	10724.6	4078.77	259106	3170.17	1968.07	-450.783	25486.4	16867.7	83122.7	3444.77	-594.083	13589.9	35129.9	1525.84	88964.2	18921.1	16564.4	6557.07	49530.1	63179.6	54327.3	44460.8	51574.9	29284.5
130	11171.9	4361.47	271075	3428.47	2220.67	-190.583	25463.2	16880.9	88579.7	3636.22	-438.383	13782.4	34913.6	1443.38	93323.7	19126.9	17023.5	6753.57	49129	63007.1	54090.9	44468.1	51589.8	29091.4
140	11219.1	4445.97	281124	3952.07	2587.97	34.5667	25522.1	16928	93838	3925.92	-290.783	14015.2	36987.7	1521.19	97418.5	19348.7	17390.4	7030.72	48840.9	62771	54337.1	44253.5	52063.2	28909.7
150	11152.1	4726.9	291780	4272.7	2720.55	361.25	25716.1	17150.1	98761.5	4236.95	-129.7	14230.9	34549.4	1556.34	101526	19572.8	17776.6	7263.6	48456.6	62500.4	54355.1	44288.7	51757.1	28996.7
160	11881.5	4824.85	301698	4547.5	2907.2	564.55	25865.7	17131.1	103833	4462.95	0.6	14359.2	34515.9	1654.73	105508	19647.6	18086.6	7477.6	48021	62675.2	54307.5	44406.9	50554.6	29033.5
170	11343.7	4958.55	310058	4727.4	3340.4	892.45	25944.8	17248.9	108763	4677.35	163	14444.8	34459	1677.82	109495	20166.6	18514.5	7668.15	47465.9	62191.5	54560.5	44128.4	49894	28389.1
180	11822	5109.53	318409	5074.58	3340.23	1185.58	25842.5	17284.9	113384	4877.58	291.383	14626.6	34238.3	1731.39	113572	20235.2	18922.5	7832.18	47030.9	61727.7	54752.3	44243.8	50369.6	27771
190	11618.4	5356.03	326001	5367.78	3721.38	1396.93	25935.2	17314.2	118030	5134.58	396.883	14767.8	34143.3	1769.43	117308	20409.7	19112.1	8081.18	46500.1	61973.6	54717.7	44344.8	49438.1	27645.7
200	11927.7	5478.85	333714	5564.3	4101.95	1613.55	25993.9	17357	122473	5316.5	559.7	14890.4	34076.6	1803.57	121199	20607.3	19433.9	8253.7	46256.8	61821.8	55071.6	44048.9	50056.3	27508.3
210	12086.8	5563.17	340511	5766.37	4377.02	1862.42	26078.9	17444.9	126978	5475.82	699.417	14878.1	34116	1899.07	124852	20730.3	19682.2	8443.22	46033.2	61745.8	55207.6	44253.5	49222.4	27063.4
220	12284.6	5629.15	346929	6059.65	4486.2	2116.1	26164.9	17567.3	131342	5656.7	771.35	14959.8	33970.2	1975.72	128590	20880.5	19905.3	8637.05	45476.1	61154.8	55325.9	43949.2	48860.1	26606.2
230	12430.3	6146.33	352977	6304.33	4824.43	2322.53	26451	17542.2	135262	5881.23	912.783	15115.3	33934.5	2124.59	131852	20986	20087.6	8781.13	44988.6	61064.9	55457.2	44024.5	48834.8	26982.1
240	12536.9	5887.63	358478	6567.38	4904.93	2511.18	26329.2	17611.3	139159	5979.23	1032.43	15197.2	33904.9	2164.28	135425	21175.7	20240.4	8959.73	44681.1	61008.5	55624.6	43592.5	48676.7	26837.7
250	12738.5	6032.03	364856	6868.93	5220.43	2743.58	26283.2	17579.5	143194	6218.18	1143.13	15308.4	33781.8	2240.82	138863	21363.3	20212.4	9115.88	44117.4	60642	55863.8	43614.8	48563.7	25992.8
260	12957.6	6411.5	370110	6798.95	5361.1	2924.1	26748	17691.3	146939	6355.5	1228.55	15418.9	33828.1	2197.52	142347	21570.3	20220.7	9305	43875.2	60424.5	56202.2	43425.1	48215.1	26083.9
270	13032.5	6519.58	374463	7123.38	5585.53	3127.38	26459.9	17869.9	150604	6502.83	1341.78	15547.7	33798.1	2245.56	145697	21753.8	20271.3	9431.33	43556.1	60084.4	56496.5	43559.6	48090.1	25994.4
280	13242.6	6680.27	379365	7340.97	5848.07	3253.77	26524.6	17892.3	154413	6671.67	1429.02	15632.6	33772	2191.04	149062	21963.5	20505.6	9519.97	43130.7	60063.3	56291.5	43404.4	47690	26232.8
290	13378.5	6811.87	384060	7599.62	6037.52	3515.97	26717.7	17933.3	158123	6840.52	1555.72	15799.2	33658.9	2278.41	152441	22158.2	20576.6	9647.82	42786.2	59763.2	56705	43949.5	47975.8	25672.9
300	13483.6	6830.42	388770	7799.32	6316.67	3616.37	26651.9	18014.9	161666	6967.97	1671.67	15909.9	33622.6	2333.43	155423	22170.6	20729.6	9820.72	42490.4	59613.4	56913.1	43427.5	47642.1	25705.8
310	13599.2	7274.48	392145	7856.93	6432.88	3852.43	26727.1	18017.4	165144	7060.13	1761.43	15945.8	33497.6	2403.4	158740	22354.7	20799.9	9797.53	42063.1	58940.3	57069.8	43736.6	47706.5	25217.8
320	13733.4	7673.38	396914	8263.43	6674.18	3999.93	26876.9	18118.5	168623	7235.53	1880.08	16050.8	33442.3	2434.14	161808	22442.7	21111.5	10053.8	41907.7	58707.5	57351.4	43202.6	47907.7	25067.7
330	13849.2	7614.48	400693	8427.68	6842.13	4170.88	26932.1	18120.7	171444	7295.28	1919.58	16171.6	33372	2324.97	164939	22507.6	21175.7	10126.5	41749.1	58302.2	57458	43880.6	47643.8	24955.3
340	13840.3	7823	403712	8582.7	6888.25	4341.1	27070.5	18245.2	174827	7423.1	2047.05	16252.6	33327.8	2422.13	167961	22803.5	21323.4	10218.6	41537.8	57937.4	57800.9	44308.8	47476.1	24461.2
350	14089.2	7947.33	406402	8707.28	7118.03	4404.28	27205.6	18307.8	178112	7590.68	2108.33	16316.3	33429.2	2531.45	170981	22857.4	21462.2	10355.8	41275.4	57842.2	57991.7	43789.9	47263.1	24287.6
360	14182.6	8130.25	410045	8785	7294.05	4626.85	27290.9	18346.9	181199	7649.3	2223.15	16404.7	33439.7	2561.02	174006	22845.9	21564.1	10545.9	40965.9	57441.5	57879.9	43476.9	47557.2	24157.6
370	14261.2	8115.87	411883	9068.47	7334.67	4761.52	27390.3	18332	184006	7731.07	2315.57	16448.5	33254.7	2649.09	176889	23017.2	21730.3	10670.7	40909.2	57166.1	58124.5	44297.3	47270.6	23968.2
380	14392.7	8083.47	417085	9197.62	7531.47	4905.12	27544	18364.4	186879	7741.32	2412.12	16591.6	33223	2625.83	179676	23102.2	21837.2	10771.1	40795.1	56798.5	58485.5	43444.4	47195.9	23723.3
390	14508	8019.03	420016	9324.53	7703.33	5056.03	27508.9	18494	189795	7947.08	2513.63	16628.3	33166.8	2767.31	182575	23189.4	21994.2	10842.5	40992.7	56469.7	58634.7	43572.8	47266	23975.3
400	14582.1	8062.23	423370	9543.08	7925.23	5261.73	27643.9	18560.3	192819	8151.38	2594.28	16742.7	33179.8	2772.38	185477	23303.9	22201.8	11071.3	42901.3	56336	58977.1	43267.1	47159	24233.1
410	14664.3	8032.35	423980	9663.8	7941	5362.6	27648.3	18581	195212	8211.65	2645.4	16807.5	33046.9	2691.74	188141	23481.6	22346.3	11151.2	43038.4	56084.6	58952.7	42808.9	47096.7	23752.8
420	14790.3	8359.2	428547	9859.85	8210.45	5520.45	27758.9	18618	198090	8371.65	2728.6	16880.9	32924.8	2737.46	190722	23553.1	22527.8	11348.8	42891.9	55994.6	59215.8	42768.4	46990.4	23520.1
430	14811.7	8621	432172	10046	8336.2	5643.2	27692.6	18650.2	200547	8427.9	2803.1	16946.9	32886.9	2726.9	193350	23575.5	22757.9	11495.2	43068.5	55481.5	59170.8	43045	46765.6	23624.2
440	14899	8691.62	432774	10122	8442.87	5804.37	27695.7	18648.9	202886	8537.32	2853.27	17004.3	32781.1	2757.56	196118	23648.4	22808.4	11587.5	43251.1	55222.4	59498.8	43021.6	46725.8	23182.9
450	14987.9	8793.4	436470	10313.1	8610.5	5907.4	27803.4	18778	205534	8641.35	2957.85	17039.4	32637.6	2784.25	199060	23697.2	22998.8	11673.4	43816.1	54953.5	59741.8	42770	46556.3	23167.2
460	14993.5	8892.05	439956	10495.5	8705.95	6024.9	27847.4	18754.5	207788	8704.7	3000.85	17071.2	32720.6	2745.59	201503	23773.9	23128	11759.5	42764.1	54637.6	60009.6	42421.2	46365.2	23329.5
470	15078	8849.98	442392	10549.7	8823.73	6196.43	27885.8	18852.9	210003	8796.03	3084.23	17108.8	32708.3	2763.97	203777	23802.8	23233.3	11889.9	42228	54536.2	60171.2	42480.9	46190.4	23224.4
480	15143	9161.27	443093	10676.6	8945.07	6302.97	27961.1	18847.4	212286	8945.92	3160.22	17261.7	32643.5	2756.91	206570	23887.4	23439.9	11974.4	42297.6	54231.2	60447.5	42471.8	46453.7	23282.3
490	15226.4	9230.4	444828	10841.3	9099.3	6390.3	27938.3	18910.8	214617	9013.55	3209.2	17305.3	32570.8	2758.89	208696	23960.1	23589.4	12068.6	43409.4	53827.7	60687.7	42767.8	46426.2	23022.7
500	15243.6	9228.63	445000	10975.8	9162.68	6472.78	28008	18935.5	216674	9104.03	3244.93	17337.6	32491.1	2717.94	211487	23922.2	23748.9	12097.4	39814.7	53924.8	60653.6	42174.4	46564.9	23061.3
510	15244	9095.55	449226	11105.3	9309.65	6579.4	28091.6	19007	218777	9213.65	3311.2	17406.2	32243	2768.3	213680	23982.2	23905.1	12137.1	39108.1	53048.1	61268.7	42144	46499.7	22962.4
520	15318.4	9364.42	451609	11253.9	9462.32	6743.62	28224.1	18965.3	220832	9298.87	3386.82	17424.1	32164.5	2776.33	216300	24107.4	24121.5	12229.6	38940.5	52488.8	61354	42251.8	46279.6	23206.7
530	15331.6	9530.7	453429	11332.3	9613.9	6808.45	28204.7	19036.2	222968	9365.75	3453.1	17484.4	32027.5	2823.53	218350	24138.5	24278.4	12396.5	38865.2	52271.1	61858	42035.1	46177	23028.4
540	15433.1	9644.88	454852	11325.2	9713.78	6882.73	28228.1	19059.9	224764	9444.68	3464.13	17501.4	31882.9	2719.12	220920	24189.5	24395.7	12509.9	38885.6	52001.9	61860.6	41971.6	46120.1	22953.5
550	15435.9	9686.55	457880	11631.3	9791.7	7002.35	28315.9	19010.9	226521	9503.35	3542.05	17578.5	31887	2730.14	223120	24287.4	24538.7	12630.2	38783.1	51843.6	61987.2	41865.5	46158.9	22744.5
560	15490.4	9781.92	459600	11779.9	9925.87	7105.82	28354.6	19093	228497	9585.27	3598.37	17659	31866.6	2733.49	225437	24328.6	24625	12738.6	38531.2	51641.3	62401.6	41896.8	46180.1	22624.6
570	15530	9773.27	460452	12064	10023	7187.57	28420.6	19210.8	230067	9651.07	3659.97	17710.8	31665.5	2683.45	227962	24448.1	24886.6	12825.9	38745.4	51415.9	62358.1	41880.8	46220.3	22756.6
580	15586.2	9727.47	462057	12295.7	10172.1	7283.57	28443.4	19056.9	232018	9753.22	3680.27	17741.9	31735.5	2691.16	229953	24442	24985.8	12877.8	38583.6	51219.7	62551.6	41926	46196.2	22758.2
590	15680	9739.28	463467	12218.3	10186.4	7364.33	28393.7	19035.8	233603	9794.88	3755.48	17769.9	31527.4	2719.81	232518	24497.8	25072.4	12957.6	38647.3	50968.5	63050.2	41866.1	45961.4	22953.6
600	15794.5	9742	464830	12152.6	10292	7443.35	28388.7	19221.2	235070	9877.2	3801.9	17817.7	31499.3	2711.16	234415	24576	25158.7	13069	38708.8	50621	62842.9	41963	46013	22710.2
610	15832.5	9887.98	466271	12561.5	10404.8	7589.38	28467.6	19131.2	236777	9912.63	3859.28	17845.5	31431.4	2736	236316	24638.5	25321.9	13129.8	38646.5	50516.1	63487.8	41865.9	45950.6	22619.7
620	15816.8	9964.8	467561	12589.7	10483.8	7649.45	28486.5	19371.8	238314	10019.9	3910.15	17936.5	31383.4	2802.13	238676	24646.1	25424.8	13205.4	38552.4	50358.7	63493.3	42012.8	46135.1	22690
630	15871.7	9983.45	468293	12553.5	10609.9	7746.3	28535.6	19157.1	239934	10086.8	3945.3	17958.1	31292.6	2797.88	240910	24663.4	25556.6	13306.4	38339.6	50092.4	63660.7	42032.1	45805.4	22696.7
640	15696.2	9833.58	469968	12858.7	10721.4	7838.38	28656.4	19300.5	241021	10134.7	3992.38	18071.2	31329.1	2869.28	242826	24798.9	25701.1	13339.6	38252.6	49564.5	63814.6	41847.3	45804	22331.7
650	15728.3	9926.6	471127	13184.9	10780.8	7916.1	28719.1	19284.6	242722	10209.1	4051.7	18093.5	31191	2793.46	244669	24774	25837.9	13374.1	38228.2	48956.5	63914.7	41848.6	45656.6	22439.8
660	15819	10289.4	471601	13161	10924.3	7990.55	28729	19267.7	244168	10273.2	4117.7	18145	31372.8	2892.26	246744	24803.7	25995.9	13494.1	38484.3	48912.8	64385.9	41965.1	45512.4	22233.4
670	15821.4	10179.3	472125	13419.5	10997.9	8087.07	28829.9	19088.7	245494	10314.5	4133.32	18166.3	31155.3	2780.58	248586	24824.9	26124	13528.9	38143.5	48633.9	64493	41947	45367.2	22207.4
680	15768.4	9858.67	473161	13327.5	11098.5	8118.02	28815.4	19247.3	246565	10335.5	4141.07	18228.6	31160.1	2781.68	250276	24885.3	26136.7	13537.1	37912.8	48346.3	64752.8	41775.3	45306.3	22108.9
690	15813.9	10359.1	473607	13584.9	11185.1	8206.85	28973.9	19384.3	248147	10407.6	4204.8	18262.5	31127.1	2779.65	251887	24862.4	26155.3	13631.8	37734.8	48168.1	64800.9	41868.4	45508.2	22117.2
700	15847.5	10388.9	473794	13485.6	11333.3	8237.33	28796.5	19447.5	249353	10451.5	4231.63	18277.6	31040.5	2729.04	253948	24919.5	26273.6	13657.1	38199	47807.7	65002.3	41867.7	45406.6	22073
710	15801.4	10038.9	475624	13652.9	11460.3	8319.5	28875.6	19179.6	250583	10516.2	4250.7	18306.4	30955.5	2727.29	255667	24947.6	26376	13723.5	38658.4	47473.2	65407.4	41838.6	45371.5	22012.5
720	15816.6	10568.9	476817	14090.3	11546.3	8350.98	28990.3	19298.4	251728	10565.3	4305.48	18323	30964.7	2754.84	257216	24964.1	26520.2	13781.2	38988.2	47181.2	65196.8	41590.3	45296.5	21987
730	15779.3	10165.3	477228	14143.1	11643.5	8443.72	28973.6	19387.9	252433	10598.2	4322.62	18180	30969.9	2728.17	259080	24965	26669.2	13824.9	40499.8	46819.7	65862.4	41721.3	45201.7	21900
740	15784.6	10457.8	478044	14157.2	11695.7	8496.03	29015.5	19433.3	253712	10669.4	4356.53	18216.1	30915	2730.66	260726	24965.9	26790.5	13878.6	39810.4	46642.1	66063.7	41507.3	45081.8	22230.4
750	15779.4	10630.6	478622	14354.7	11812.2	8557.3	28967.2	19382.3	255087	10728.3	4388.85	18184.8	30862.2	2720.44	262188	25045.3	26874.7	13915.5	38826.5	46458.2	66096	41414.8	44954.8	22099.4
760	15832.4	10265.6	478834	14466.8	11969.7	8668.98	29074.9	19546.7	255635	10777.1	4449.48	18216.8	30933.1	2699.32	264025	25050.2	27022.7	13992	38901.2	46336.1	66264.4	41244.6	44922.8	21840.5
770	15826.7	10671.8	479271	14601.4	12039.2	8708.35	29099.9	19389.4	256820	10831.2	4462.85	18289.8	30892.1	2631.47	265586	25169.3	27164.1	14003.2	39352.6	46147.1	66393.9	41331.9	44603.9	21718
780	15837	10588.6	479935	14591.2	12135.8	8746.5	29120.8	19263	257982	10841.5	4494.1	18257.4	30833.1	2602.31	267099	25130.5	27252.9	14054.8	38250.9	46098.1	66536.4	41341	44589.7	21752.7
790	15846.4	10600.1	479829	14740.3	12238	8824.63	29184.8	19423.4	258487	10901.8	4558.33	18272.2	30793.7	2634.14	268604	25150.9	27395.4	14086.3	37687.4	45956.3	66870.1	41301.3	44777.1	21614.3
800	15892.3	10838.9	481266	14848.1	12357.7	8902.67	29187.3	19590.4	259551	10976.9	4597.82	18342.6	30814	2659.52	270344	25189.5	27465.4	14109.1	37353	45739	67097.5	41265.8	44748.2	21602
810	15874.7	10376	480617	14975.7	12459	8990.47	29211	19651.9	260501	11015	4617.02	18401	30786.2	2661.13	271971	25223.5	27650.9	14203.9	35965.2	45673.8	67243.2	41260.9	44666.7	21737.5
820	15873.7	10852.8	480839	15069.7	12533.8	9042.88	29346.8	19704.5	261233	11058.2	4639.33	18420	30789.9	2669.35	273403	25250	27803	14213.6	36095.2	45255.9	67525.6	41535.2	44747.3	21591.9
830	15901.4	10827.3	480675	15149.7	12692.3	9099.63	29428.8	19697	262029	11112.6	4672.28	18457	30725.8	2635.93	274863	25313.1	27936.1	14253.2	36201.9	45034.7	67752.8	41311	44710.4	21385
840	15871	10629.9	480031	15223.8	12793.2	9163.3	29439	19757.2	263071	11144.2	4704.6	18514.9	30626.8	2670.07	276348	25291.2	28090.1	14297.9	35906.3	44783.6	67871.1	41195.4	44508.2	21391.8
850	15963.8	11021.8	480283	15341.4	12905.9	9242.73	29557.2	19774.6	263676	11214.4	4746.03	18495.2	30657.2	2596.35	277842	25382.8	28216	14343.1	33757.3	44580.5	68076.7	41249.5	44849.6	21372.6
860	15881.5	10578.6	480000	15509.3	12931.4	9250.07	29482.2	19748.5	264479	11241.4	4768.47	18552.2	30684.4	2572.76	279288	25369.7	28356.9	14403.9	30714.7	44352	68130.4	41391.1	44816.4	21206.7
870	15917.2	11038.3	479650	15642.8	13069.3	9347.77	29495.4	19623.6	265292	11288.7	4782.42	18581.1	30697.4	2605.2	280637	25373.3	28523.6	14383.5	30109.2	44171.7	68342.7	42610.1	44950.8	21300.4
880	15945.2	10653.8	479834	15663.6	13185.2	9376.32	29444.4	19724.9	266055	11327.3	4871.37	18652.9	30607.6	2626.3	281849	25442.3	28605.3	14405	29956.8	44146.6	68747	42805.9	45024.5	21164.9
890	15945.8	10967	479471	15876.2	13263.2	9471.92	29492.6	19775	266682	11386.6	4877.62	18645.9	30478.8	2575.19	283082	25471.3	28786.6	14437.2	29071.4	43937.8	68744.3	42607.6	44980.7	21137.2
			Day 2	Day 3	Day 4	Day 7
B average (excl. B3) (600)			11.0849	15.8214	19.4029	40.0032
B3 average (600)			464.83	235.07	234.415	62.8429

## Sheet: Initial screening
Time(min)	Py-a	Py-b	MI-a	MI-b	DI-a	DI-b	S-a	S-b	B-a	B-b					Time(min)	Py	MI	DI	S	B
0	1247.88	1364.05	1252.13	1307.3	193.231	128.45	17.7599	15.7962	-0.6313	-3.4124					0	1305.96	1279.71	160.84	16.7781	-2.02185
10	1371.84	1559.5	1386.67	1467.58	391.253	275.979	27.8401	24.1293	1.0752	-2.3451					10	1465.67	1427.13	333.616	25.9847	-0.63495
20	1459.24	1705.65	1480.81	1566.77	493.045	361.276	35.1569	30.7224	2.9892	-1.3005					20	1582.44	1523.79	427.161	32.9397	0.84435
30	1532.4	1812.79	1547.7	1635.86	554.23	418.344	41.3567	35.3398	4.5981	-0.6323					30	1672.6	1591.78	486.287	38.3483	1.9829
40	1594.49		1593.8	1694.76	597.106	460.24	45.941	39.2853	6.3869	-0.059					40	1594.49	1644.28	528.673	42.6132	3.16395
50	1654.91		1648.06	1747.39	632.44	493.966	49.5194	42.0399	8.1084	0.4519					50	1654.91	1697.72	563.203	45.7796	4.28015
60	1705.42		1683.06	1786.87	662.348	522.519	52.9257	45.0043	10.0893	1.0583					60	1705.42	1734.96	592.434	48.965	5.5738
70	1749.77		1715.8		685.883	546.223	55.3555	47.1963	12.1553	1.3876					70	1749.77	1715.8	616.053	51.2759	6.77145
80	1785.57		1745.44		702.624	566.329	57.8044	48.8214	14.506	1.9561					80	1785.57	1745.44	634.476	53.3129	8.23105
90	1818.85		1770.83		717.915	584.144	60.3971	50.6609	16.6483	2.2723					90	1818.85	1770.83	651.029	55.529	9.4603
100			1790.88		735.644	601.304	62.7348	52.1142	19.1572	2.7903					100		1790.88	668.474	57.4245	10.9737
110			1816.35		751.564	614.828	64.4977	54.004	21.988	3.2488					110		1816.35	683.196	59.2508	12.6184
120					763.448	626.811	66.667	55.3097	24.2354	3.7052					120			695.13	60.9884	13.9703
130					774.327	636.603	68.3626	56.28	27.0849	4.2559					130			705.465	62.3213	15.6704
140					784.656	646.301	69.2905	57.185	29.6224	4.5653					140			715.478	63.2377	17.0938
150					792.654	655.047	71.1355	58.6686	32.1362	4.9967					150			723.85	64.9021	18.5664
160					800.905	663.335	72.6265	59.5428	35.0942	5.406					160			732.12	66.0846	20.2501
170					809.295	668.822	73.5257	60.6316	37.9267	5.6535					170			739.058	67.0786	21.7901
180					816.884	674.152	75.2838	61.8477	40.5116	5.9995					180			745.518	68.5657	23.2556
190					821.322	678.793	76.0636	62.6074	43.294	6.3445					190			750.057	69.3355	24.8192
200					826.956	682.744	77.5902	63.7253	46.4956	6.7049					200			754.85	70.6577	26.6002
210					832.118	685.915	78.4726	64.4236	48.6117	7.144					210			759.016	71.4481	27.8779
220					837.37	690.009	78.8089	65.0793	50.7589	7.4735					220			763.689	71.9441	29.1162
230					841.998	692.506	80.4359	65.982	52.8517	7.7982					230			767.252	73.2089	30.325
240					846.001	693.542	81.8093	66.8397	55.1273	8.1061					240			769.772	74.3245	31.6167
250					848.544	695.771	82.8098	66.9817	56.9396	8.3949					250			772.157	74.8958	32.6673
